# Supplementary material
Source: publisher figshare collection journal article supplement (https://karger.figshare.com/ndownloader/files/14038850)
Supplement: Supplementary file 1 [file 14038850]

Supplementary file 2. Web of Science search strategy

(telemedicine OR “mobile health” OR mhealth OR telehealth OR ehealth OR “digital health” OR internet OR mobile OR web OR smartphone$ OR smartwatch OR wearable$ OR phone$ OR sensor$ OR monitoring OR app$ OR application$ OR “mobile application$”) AND (“secondary prevention” OR “relapse prevention”) AND (“cardiovascular diseases” OR stroke$ OR “Cerebrovascular Accident$” OR CVA$ OR “Cerebrovascular Apoplex*” OR “Brain Vascular Accident$” OR “Cerebrovascular Stroke$” OR Apoplex* OR “Cerebral Stroke$”) AND (“Cost-benefit anal?s?s” OR “Cost-Effectiveness” OR “Cost-Utility Anal?s$?s” OR “Cost-Utility” OR “Economic Evaluation*” OR “Marginal Analysis” OR “Marginal Analyses” OR “Cost-Benefit” OR “Costs and Benefits” OR “Benefits and Costs” OR Cost$)
